# Supplementary material
Source: Frontiers journal article supplement (https://www.frontiersin.org/articles/221179)
Supplement: Image_2.PDF [file Image_2.PDF]

FIGURE S2

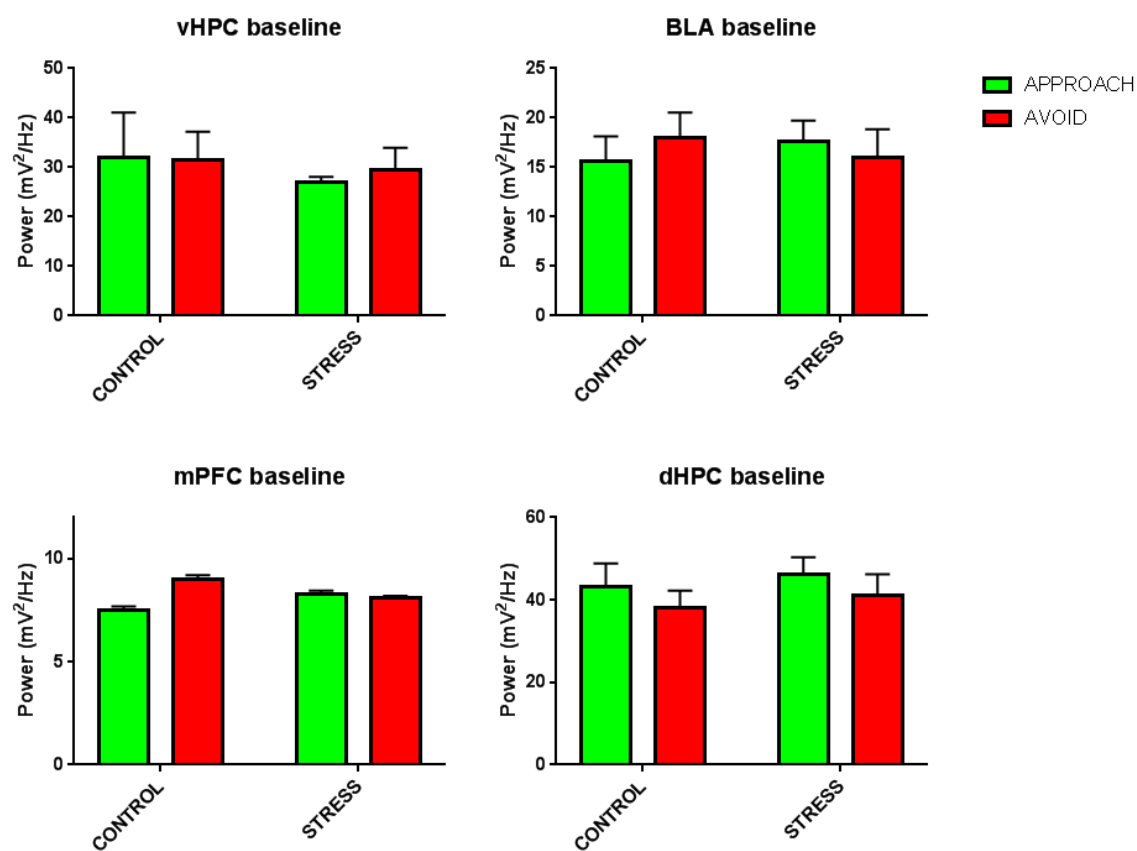

**Figure S2.** Averaged baseline theta power for control and stressed animals preceding approach or avoidance actions for vHPC (top left), BLA (top right), mPFC(PrL) (bottom left) and dHPC (bottom right).
